# Supplementary material
Source: publisher figshare collection journal article supplement (https://acs.figshare.com/ndownloader/files/4125592)
Supplement: Supplementary file 1 [file 4125592]

# A Theoretical Study of Atomic Oxygen on Gold Surface by Hückel Theory and DFT Calculations

*Keju Sun<sup>1,2\*</sup>, Masanori Kohyama<sup>1</sup>, Shingo Tanaka<sup>1</sup> and Seiji Takeda<sup>2</sup>*

1) Research Institute for Ubiquitous Energy Devices, National Institute of Advanced Industrial Science and Technology (AIST), 1-8-31, Midorigaoka, Ikeda, Osaka 563-8577, Japan

2) The Institute of Scientific and Industrial Research, Osaka University, 8-1 Mihogaoka, Ibaraki, Osaka 567-0047, Japan

The argument of the Au-O bond energy can be also generalized by the Au-O bond order in the Au-O, Au-O-Au and O-Au-O structures as follows. For Au-O, the wave functions can be defined as

$$\Psi = c_1^{Au-O} \phi_1 + c_2^{Au-O} \phi_2 \quad (S1)$$

And the secular equation is expressed as

$$\begin{cases} (\alpha_O - E)c_1 + \beta_{O-Au}c_2 = 0 \\ \beta_{O-Au}c_1 + (\alpha_{Au} - E)c_2 = 0 \end{cases} \quad (S2)$$

The corresponding secular determinant is

$$\begin{vmatrix} \alpha_O - E & \beta_{O-Au} \\ \beta_{O-Au} & \alpha_{Au} - E \end{vmatrix} = 0 \quad (S3)$$

And the solutions of the secular determinant for Au-O are given by

$$\begin{cases} E_1^{O-Au} = \alpha - \frac{-h - \sqrt{h^2 + 4}}{2} \beta \\ E_2^{O-Au} = \alpha - \frac{-h + \sqrt{h^2 + 4}}{2} \beta \end{cases} \quad (S4)$$

where the definition of  $\alpha$ ,  $\beta$  and  $h$  are given in the text.

Put the values of  $E_1^{O-Au}$  and  $E_2^{O-Au}$  into equation (S2), and consider the normalization of coefficient  $c_1$  and  $c_2$ , namely,

$$c_1^2 + c_2^2 = 1 \quad (S5)$$

So we can obtain  $c_1$  and  $c_2$  for  $\Psi_1$  as,

$$\begin{cases} c_{1,1} = \frac{h + \sqrt{h^2 + 4}}{\sqrt{(h + \sqrt{h^2 + 4})^2 + 4}} \\ c_{1,2} = \frac{2}{\sqrt{(h + \sqrt{h^2 + 4})^2 + 4}} \end{cases} \quad (S6)$$

And for  $\Psi_2$ ,

$$\begin{cases} c_{2,1} = \frac{h - \sqrt{h^2 + 4}}{\sqrt{(h - \sqrt{h^2 + 4})^2 + 4}} \\ c_{2,2} = \frac{2}{\sqrt{(h - \sqrt{h^2 + 4})^2 + 4}} \end{cases} \quad (S7)$$

Therefore, the wave functions for the two orbitals are

$$\begin{cases} \Psi_1 = \frac{h + \sqrt{h^2 + 4}}{\sqrt{(h + \sqrt{h^2 + 4})^2 + 4}} \phi_1 + \frac{2}{\sqrt{(h + \sqrt{h^2 + 4})^2 + 4}} \phi_2 \\ \Psi_2 = \frac{h - \sqrt{h^2 + 4}}{\sqrt{(h - \sqrt{h^2 + 4})^2 + 4}} \phi_1 + \frac{2}{\sqrt{(h - \sqrt{h^2 + 4})^2 + 4}} \phi_2 \end{cases} \quad (S8)$$

Thus, the bond order of every Au-O  $\pi$ -bond is obtained as

$$P_1 = \sum_i n_i c_{i,u} c_{i,v} = 2c_{1,1}c_{1,2} + c_{2,1}c_{2,2} = \frac{4(h + \sqrt{h^2 + 4})}{(h + \sqrt{h^2 + 4})^2 + 4} + \frac{2(h - \sqrt{h^2 + 4})}{(h - \sqrt{h^2 + 4})^2 + 4} \quad (S9)$$

Next, we consider the bond order of Au-O  $\pi$  bond of Au-O-Au. The wave function for Au-O-Au is expressed as

$$\Psi = c_1^{Au-O} \phi_1 + c_2^{Au-O} \phi_2 + c_3^{Au-O} \phi_3 \quad (S10)$$

The secular equation is given as

$$\begin{cases} (\alpha_{Au} - E)c_1 + \beta_{O-Au}c_2 = 0 \\ \beta_{O-Au}c_1 + (\alpha_O - E)c_2 + \beta_{O-Au}c_3 = 0 \\ \beta_{O-Au}c_2 + (\alpha_{Au} - E)c_3 = 0 \end{cases} \quad (S11)$$

And the corresponding secular determinant is

$$\begin{vmatrix} \alpha_{Au} - E & \beta_{O-Au} & 0 \\ \beta_{O-Au} & \alpha_O - E & \beta_{O-Au} \\ 0 & \beta_{O-Au} & \alpha_{Au} - E \end{vmatrix} = 0 \quad (S12)$$

The solutions of the secular determinant for Au-O-Au are given by

$$\begin{cases} E_1^{\text{Au-O-Au}} = \alpha - \frac{-h - \sqrt{h^2 + 8}}{2} \beta \\ E_2^{\text{Au-O-Au}} = \alpha \\ E_3^{\text{Au-O-Au}} = \alpha - \frac{-h + \sqrt{h^2 + 8}}{2} \beta \end{cases} \quad (\text{S13})$$

Put the values of  $E_1$ ,  $E_2$  and  $E_3$  into equation (S11), and consider the normalization of coefficient  $c_1$ ,  $c_2$  and  $c_3$ ,

$$c_1^2 + c_2^2 + c_3^2 = 1 \quad (\text{S14})$$

So the values of  $c_1$ ,  $c_2$  and  $c_3$  for  $\Psi_1$  are,

$$\begin{cases} c_{1,1} = \frac{2}{\sqrt{(h + \sqrt{h^2 + 8})^2 + 8}} \\ c_{1,2} = \frac{h + \sqrt{h^2 + 8}}{\sqrt{(h + \sqrt{h^2 + 8})^2 + 8}} \\ c_{1,3} = \frac{2}{\sqrt{(h + \sqrt{h^2 + 8})^2 + 8}} \end{cases} \quad (\text{S15})$$

And for  $\Psi_2$ ,

$$\begin{cases} c_{2,1} = \frac{\sqrt{2}}{2} \\ c_{2,2} = 0 \\ c_{2,3} = -\frac{\sqrt{2}}{2} \end{cases} \quad (\text{S16})$$

For  $\Psi_3$ ,

$$\begin{cases} c_{3,1} = \frac{2}{\sqrt{(h - \sqrt{h^2 + 8})^2 + 8}} \\ c_{3,2} = \frac{h - \sqrt{h^2 + 8}}{\sqrt{(h - \sqrt{h^2 + 8})^2 + 8}} \\ c_{3,3} = \frac{2}{\sqrt{(h - \sqrt{h^2 + 8})^2 + 8}} \end{cases} \quad (\text{S17})$$

Therefore, the wave functions for the three orbitals are given as

$$\begin{cases} \Psi_1 = \frac{2}{\sqrt{(h + \sqrt{h^2 + 8})^2 + 8}} \phi_1 + \frac{h + \sqrt{h^2 + 8}}{\sqrt{(h + \sqrt{h^2 + 8})^2 + 8}} \phi_2 + \frac{2}{\sqrt{(h + \sqrt{h^2 + 8})^2 + 8}} \phi_3 \\ \Psi_2 = \frac{\sqrt{2}}{2} \phi_1 - \frac{\sqrt{2}}{2} \phi_3 \\ \Psi_3 = \frac{2}{\sqrt{(h - \sqrt{h^2 + 8})^2 + 8}} \phi_1 + \frac{h - \sqrt{h^2 + 8}}{\sqrt{(h - \sqrt{h^2 + 8})^2 + 8}} \phi_2 + \frac{2}{\sqrt{(h - \sqrt{h^2 + 8})^2 + 8}} \phi_3 \end{cases} \quad (\text{S18})$$

The bond order of every Au-O  $\pi$ -bond in Au-O-Au is obtained as

$$P_2 = \sum_i n_i c_{i,u} c_{i,v} = 2c_{1,1}c_{1,2} + 2c_{2,1}c_{2,2} + c_{3,1}c_{3,2} = \frac{4(h + \sqrt{h^2 + 8})}{(h + \sqrt{h^2 + 8})^2 + 8} + \frac{2(h - \sqrt{h^2 + 8})}{(h - \sqrt{h^2 + 8})^2 + 8} \quad (\text{S19})$$

Finally, we consider the bond order of Au-O  $\pi$  bond in O-Au-O.

The wave function for O-Au-O is expressed as

$$\Psi = c_1^{Au-O} \phi_1 + c_2^{Au-O} \phi_2 + c_3^{Au-O} \phi_3 \quad (\text{S20})$$

The secular equation is given as

$$\begin{cases} (\alpha_O - E)c_1 + \beta_{O-Au}c_2 = 0 \\ \beta_{O-Au}c_1 + (\alpha_{Au} - E)c_2 + \beta_{O-Au}c_3 = 0 \\ \beta_{O-Au}c_2 + (\alpha_O - E)c_3 = 0 \end{cases} \quad (\text{S21})$$

And the corresponding secular determinant is

$$\begin{vmatrix} \alpha_O - E & \beta_{O-Au} & 0 \\ \beta_{O-Au} & \alpha_{Au} - E & \beta_{O-Au} \\ 0 & \beta_{O-Au} & \alpha_O - E \end{vmatrix} = 0 \quad (\text{S22})$$

The solutions of the secular determinant for O-Au-O are given by

$$\begin{cases} E_1^{\text{O-Au-O}} = \alpha - \frac{-h - \sqrt{h^2 + 8}}{2} \beta \\ E_2^{\text{O-Au-O}} = \alpha + h\beta \\ E_3^{\text{O-Au-O}} = \alpha - \frac{-h + \sqrt{h^2 + 8}}{2} \beta \end{cases} \quad (\text{S23})$$

Put the values of  $E_1$ ,  $E_2$  and  $E_3$  into equation (S21), and consider the normalization of coefficient  $c_1$ ,  $c_2$  and  $c_3$ ,

$$c_1^2 + c_2^2 + c_3^2 = 1 \quad (\text{S24})$$

So the values of  $c_1$ ,  $c_2$  and  $c_3$  for  $\Psi_1$  are given as

$$\begin{cases} c_{1,1} = \frac{2}{\sqrt{(h - \sqrt{h^2 + 8})^2 + 8}} \\ c_{1,2} = \frac{-h + \sqrt{h^2 + 8}}{\sqrt{(h - \sqrt{h^2 + 8})^2 + 8}} \\ c_{1,3} = \frac{2}{\sqrt{(h - \sqrt{h^2 + 8})^2 + 8}} \end{cases} \quad (\text{S25})$$

For  $\Psi_2$ ,

$$\begin{cases} c_{2,1} = \frac{\sqrt{2}}{2} \\ c_{2,2} = 0 \\ c_{2,3} = -\frac{\sqrt{2}}{2} \end{cases} \quad (\text{S26})$$

For  $\Psi_3$ ,

$$\begin{cases} c_{3,1} = \frac{2}{\sqrt{(h + \sqrt{h^2 + 8})^2 + 8}} \\ c_{3,2} = \frac{-h - \sqrt{h^2 + 8}}{\sqrt{(h + \sqrt{h^2 + 8})^2 + 8}} \\ c_{3,3} = \frac{2}{\sqrt{(h + \sqrt{h^2 + 8})^2 + 8}} \end{cases} \quad (\text{S27})$$

Therefore, the wave functions are

$$\left\{ \begin{array}{l} \Psi_1 = \frac{2}{\sqrt{(h - \sqrt{h^2 + 8})^2 + 8}} \phi_1 + \frac{-h + \sqrt{h^2 + 8}}{\sqrt{(h - \sqrt{h^2 + 8})^2 + 8}} \phi_2 + \frac{2}{\sqrt{(h - \sqrt{h^2 + 8})^2 + 8}} \phi_3 \\ \Psi_2 = \frac{\sqrt{2}}{2} \phi_1 - \frac{\sqrt{2}}{2} \phi_3 \\ \Psi_3 = \frac{2}{\sqrt{(h + \sqrt{h^2 + 8})^2 + 8}} \phi_1 + \frac{-h - \sqrt{h^2 + 8}}{\sqrt{(h + \sqrt{h^2 + 8})^2 + 8}} \phi_2 + \frac{2}{\sqrt{(h + \sqrt{h^2 + 8})^2 + 8}} \phi_3 \end{array} \right. \quad (\text{S28})$$

The bond order of every Au-O  $\pi$ -bond in O-Au-O is obtained as

$$P_3 = \sum_i n_i c_{i,u} c_{i,v} = 2c_{1,1}c_{1,2} + 2c_{2,1}c_{2,2} = \frac{4(-h + \sqrt{h^2 + 8})}{(h - \sqrt{h^2 + 8})^2 + 8} \quad (\text{S29})$$

According to the expressions of Au-O bond orders in O-Au (P1), Au-O-Au (P2) and O-Au-O (P3), we can describe each bond order as a function of h as shown in Figure 1S, indicating that the Au-O bond order is largest in the O-Au-O structure.

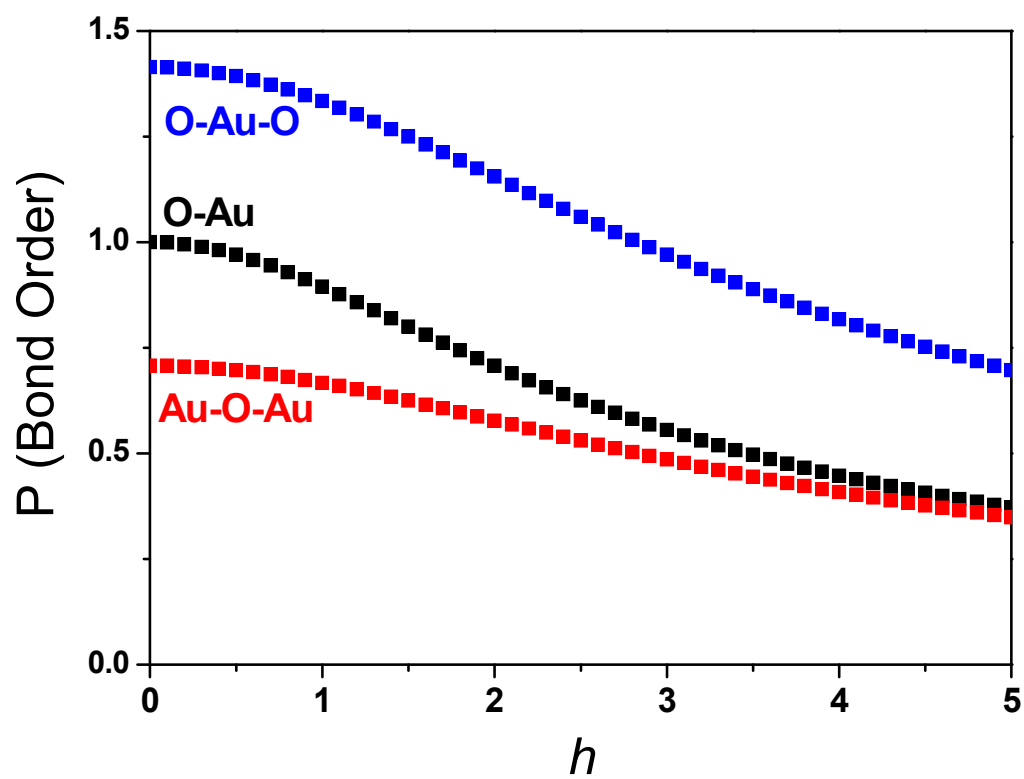

**Figure 1S.** The relationship between  $h$  and the bond orders of Au-O in O-Au, Au-O-Au and O-Au-O respectively.



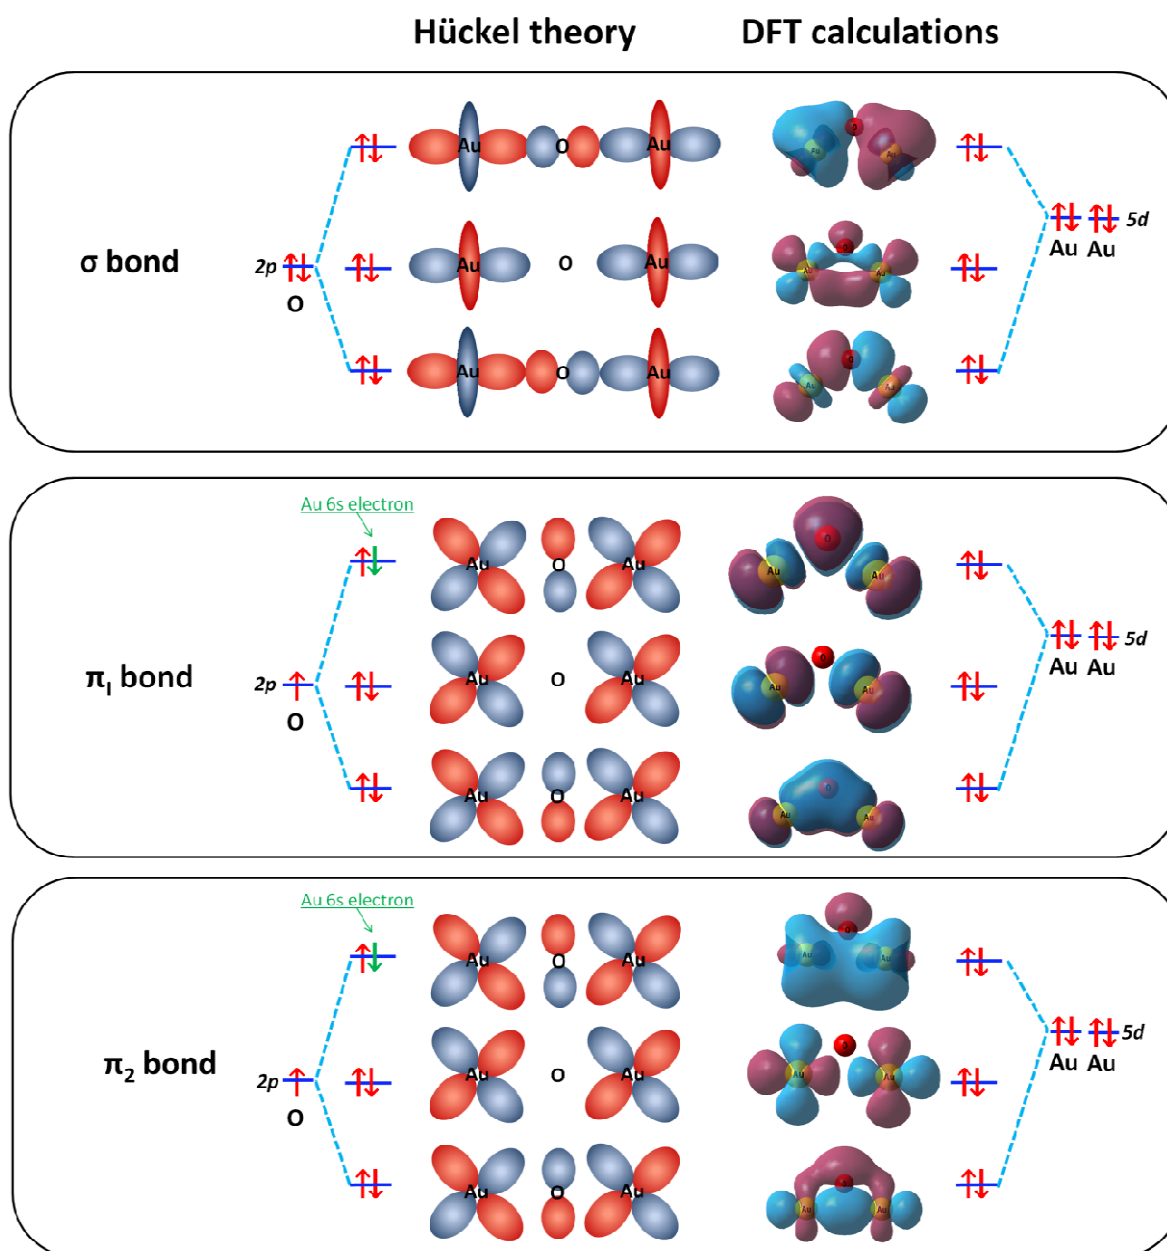

**Figure 2S.** The molecular orbitals of Au-O-Au from Hückel theory and DFT calculations. The tiny difference in the shapes of the molecular orbitals comes from the difference angle of Au-O-Au in Hückel theory and DFT calculations. To clarity, the 6s electrons of Au in the results of Hückel theory are marked as green color.
